# Supplementary material for: High Throughput Analyses of Budding Yeast ARSs Reveal New DNA Elements Capable of Conferring Centromere-Independent Plasmid Propagation
Source: PubMed Central journal article supplement (PMC4825667; doi:10.1534/g3.116.027904), 2016-02-08
Supplement: supp_g3.116.027904_FigureS4.pdf [file supp_g3.116.027904_FigureS4.pdf]

A

B1

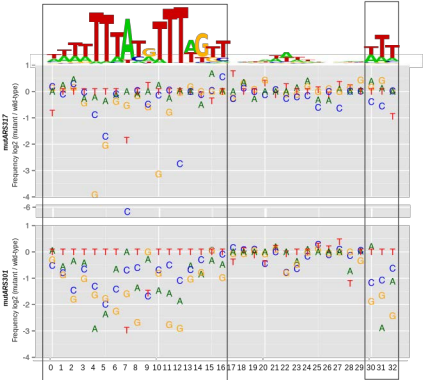

Figure S4 The mutational profile of the ORC binding sites within the silencer miniARSs: A consensus ORC site derived from high-confidence ORC binding sites within the yeast genome ( $n \sim 232$ ) is shown above the two profiles.
