# Supplementary material for: High Throughput Analyses of Budding Yeast ARSs Reveal New DNA Elements Capable of Conferring Centromere-Independent Plasmid Propagation
Source: PubMed Central journal article supplement (PMC4825667; doi:10.1534/g3.116.027904), 2016-02-08
Supplement: supp_g3.116.027904_FigureS5.pdf [file supp_g3.116.027904_FigureS5.pdf]

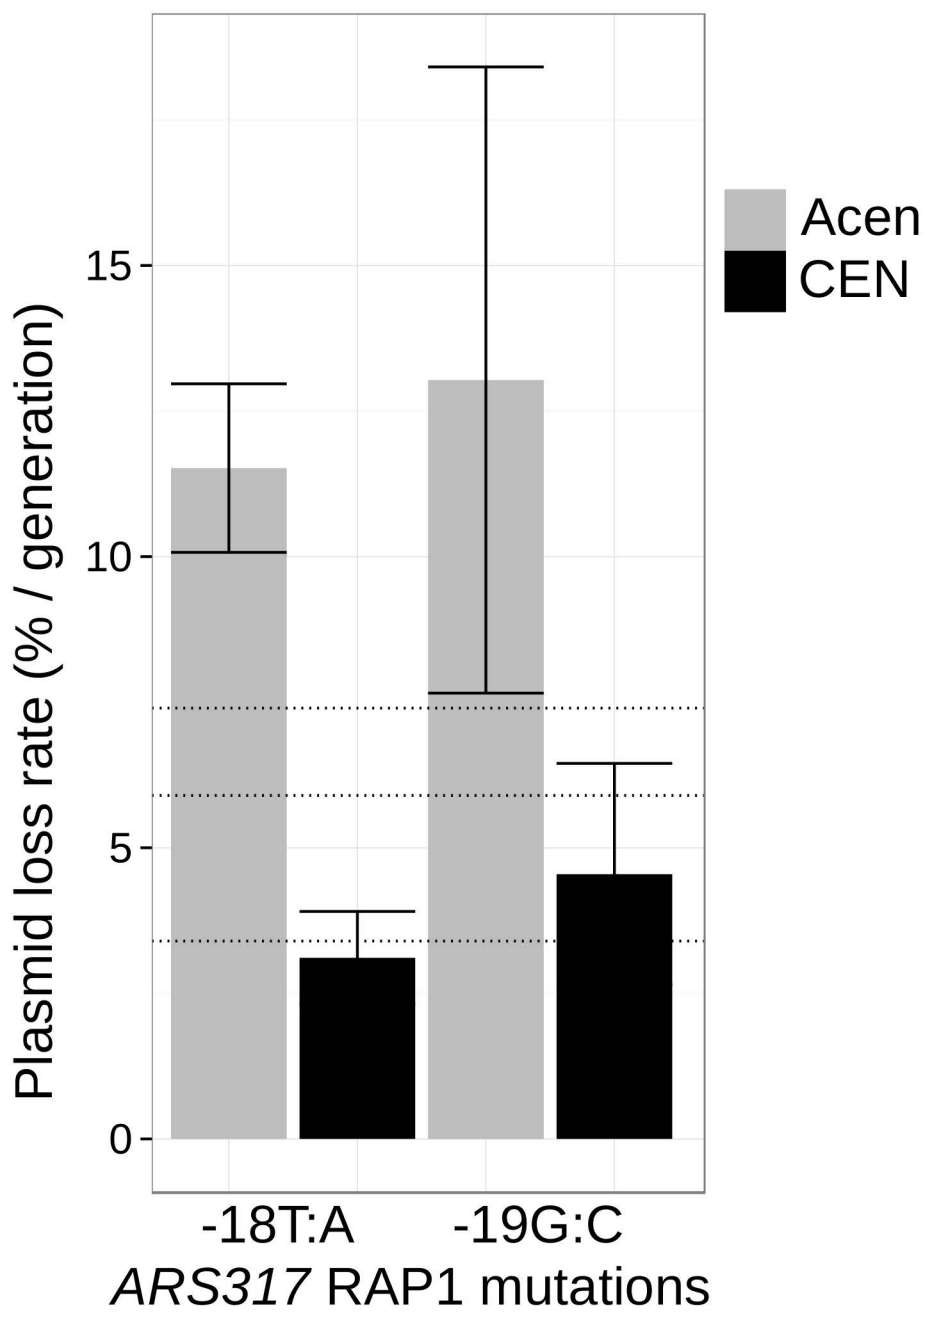

Figure S5 Single-nucleotide substitutions reduce the stability of an Acen plasmid but not a Cen plasmid harboring miniARS317max (see Figure 1C). ARS assays performed as in Figures 3 and 5. The dotted lines indicate the mean of the PLRs for the Acen plasmids shown in Figure 3 (fragments 6, 7 and 8) +/- one standard deviation.
