# Supplementary material for: High Throughput Analyses of Budding Yeast ARSs Reveal New DNA Elements Capable of Conferring Centromere-Independent Plasmid Propagation
Source: PubMed Central journal article supplement (PMC4825667; doi:10.1534/g3.116.027904), 2016-02-08
Supplement: supp_g3.116.027904_FigureS6.pdf [file supp_g3.116.027904_FigureS6.pdf]

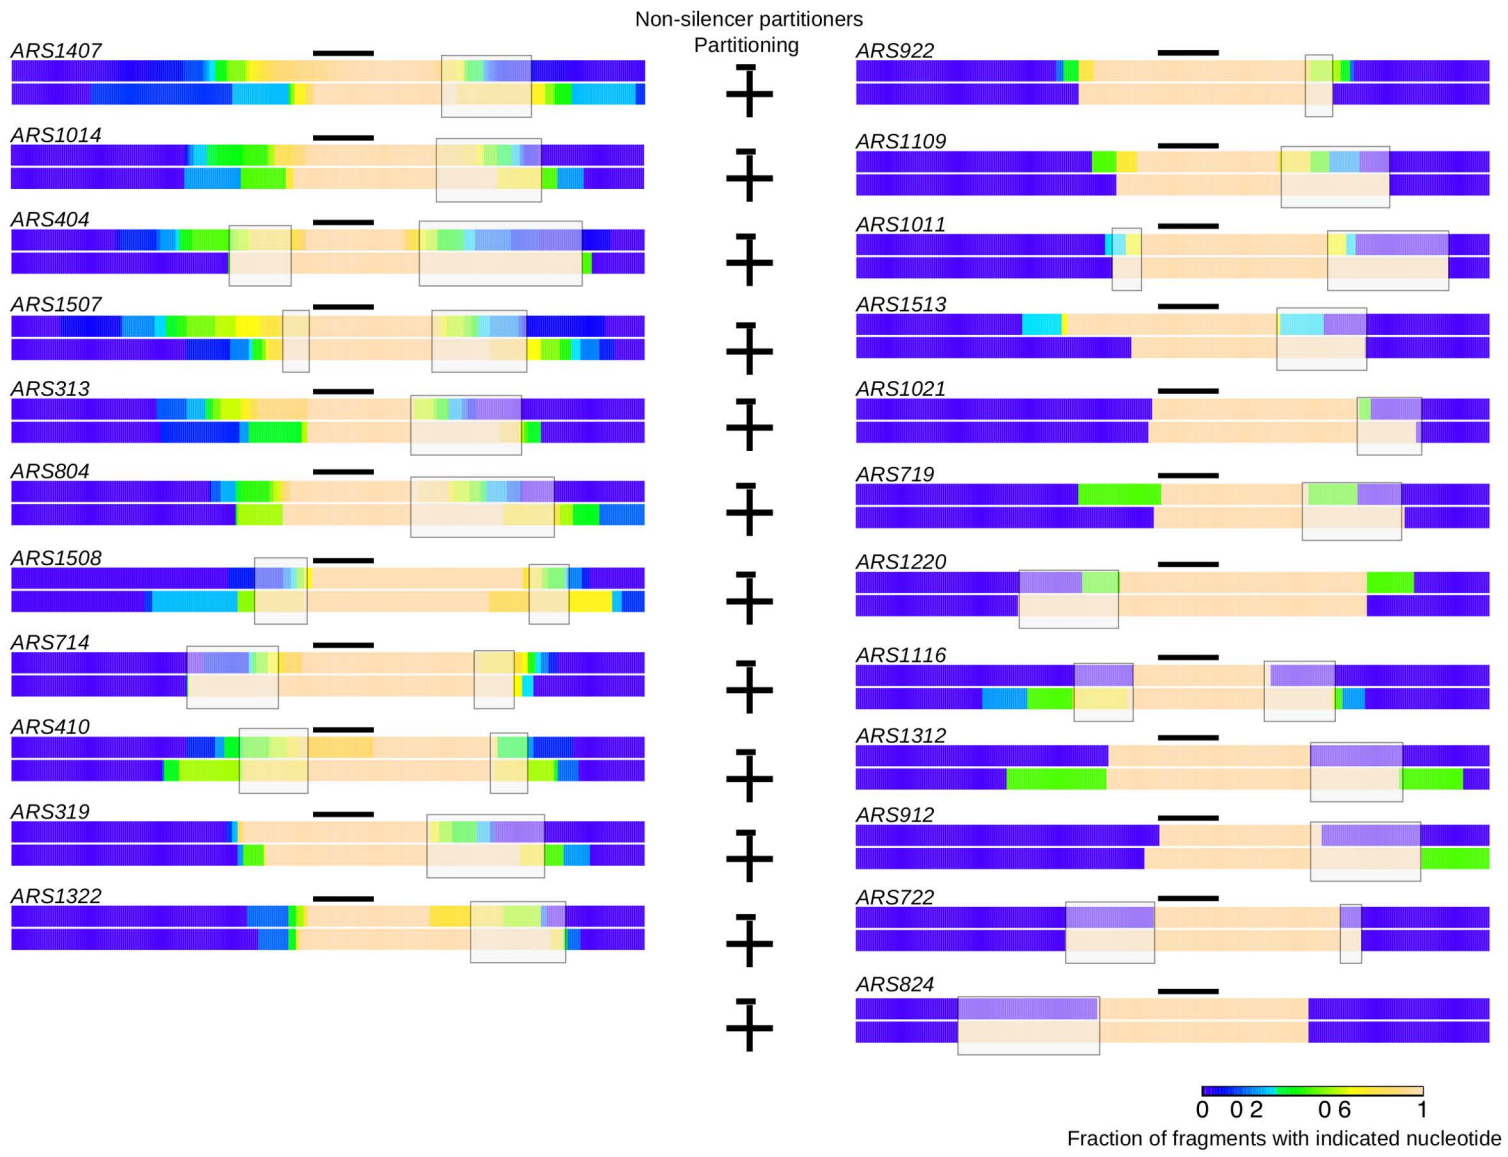

Figure S6 Partitioning regions were mapped for the remaining non-silencer partitioning origins identified based on the fragment distribution analyses in Figure 6B and further analyses of fragments from the individual ARSs indicated as in Figure 7B. The boxed regions indicate “partitioning regions” defined as DNA sequence gained as the fragment gained partitioning ability. Motifs identified in these regions were considered putative partitioning elements and used for the analyses in Figure 8. These motifs are listed in Table S1.
