# Supplementary material for: High Throughput Analyses of Budding Yeast ARSs Reveal New DNA Elements Capable of Conferring Centromere-Independent Plasmid Propagation
Source: PubMed Central journal article supplement (PMC4825667; doi:10.1534/g3.116.027904), 2016-02-08
Supplement: supp_g3.116.027904_FileS1.pdf [file supp_g3.116.027904_FileS1.pdf]

```

%%%%%%%%%%%%%%%%%%%%%%%%%%%%%%%%%%%%%%%%%%%%%%%%%%%%%%%%%%%%%%%%%%%%%%%%
%
% Numerical simulations of
% plasmid partitioning elements
% in budding yeast ARSs
%
%%%%%%%%%%%%%%%%%%%%%%%%%%%%%%%%%%%%%%%%%%%%%%%%%%%%%%%%%%%%%%%%%%%%%%%%

```

```

%%%% yeast cells -- ARS fragments -- simulation

```

```

%%%% rf; %% replication fitness
%%%% pf; %% partition fitness
%%%% cp; %% crowding penalty

```

```

number_of_generations = 12;

```

```

cp = 0;

```

```

number_of_cells = 0;
mean_number_of_fragments = 0;
total_number_of_fragments = 0;

```

```

for jj = 1:10 %% jj specifies replication fitness

```

```

    rf = 0.50 + 0.05*(jj-1);

```

```

    for kk = 1:10 %% kk specifies partition fitness

```

```

        pf = 0.50 + 0.05*(kk-1);

```

```

        init = zeros(10,2); %% [cell index, number of fragments]

```

```

        init(1:10,1) = 1:10; %% start with 10 cells

```

```

        init(1:10,2) = 1; %% each initial cell has exactly one ARS

```

```

        fragment

```

```

        cells = init;

```

```

        %%% simulate cell growth for given parameters rf, pf, and cp

```

```

        for gen = 1:number_of_generations

```

```

            for i = 1:size(cells,1)

```

```

                %%% random "noise" -- variations in noise level have

```

```

very small effect
between 0.8 & 1.2
gamma(1,0.01)
    rrf = rf*gamrnd(100,0.01); %% "gamrnd(100,0.01)" is ~
    rpf = pf*gamrnd(100,0.01); %% "gamrnd(100,0.01)" is ~
    %%% cells(i,2) = round ( cells(i,2)*(1+rrf) );
    cells(i,2) = round ( cells(i,2)*(1+rrf* ( 1/
(1+cp*(cells(i,2)/100) ) ) ) );
    separe_fragments = floor ( cells(i,2)*(1-rpf) );
    if separe_fragments > 0;
        cells(i,2) = cells(i,2) - separe_fragments;
        eend = size(cells,1);
        cells(eend+1,:) = [eend+1,separe_fragments];
    end
end
end

%% [size(cells), mean(cells(:,2)), sum(cells(:,2))]
%% figure; plot(cells(:,1),cells(:,2),'k.');
```

```

    number_of_cells(jj,kk) = size(cells,1);
    mean_number_of_fragments(jj,kk) = mean(cells(:,2));
    total_number_of_fragments(jj,kk) = sum(cells(:,2));

end

end

figure; imagesc(number_of_cells)
xlabel('partition fitness between 0.5 and 0.95')
ylabel('replication fitness between 0.5 and 0.95')
title('number of cells')

figure; imagesc(mean_number_of_fragments)
xlabel('partition fitness between 0.5 and 0.95')
ylabel('replication fitness between 0.5 and 0.95')
title('mean number of fragments')

figure; imagesc(total_number_of_fragments)
xlabel('partition fitness between 0.5 and 0.95')
ylabel('replication fitness between 0.5 and 0.95')
title('total number of fragments')

%% a few examples for "crowding penalty"
% figure; ezplot('1/(1+5*(x/100))',[0,200,0,1])
% hold on; ezplot('1/(1+1*(x/100))',[0,200,0,1])
% hold on; ezplot('1/(1+0.2*(x/100))',[0,200,0,1])
% xlabel('number of fragments inside a cell')
% ylabel('crowding penalty')
```

```
% title('crowding penalty vs. number of fragments inside a cell')
```
